# Supplementary material for: Computational Identification and Analysis of Ubiquinone-Binding Proteins
Source: MDPI journal article supplement (doi:10.3390/cells9020520), 2020-02-24
Supplement: s1 [file s1]

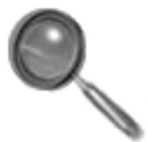

# MEME

Multiple Em for Motif Elicitation

For further information on how to interpret these results please access <http://meme-suite.org/>.  
To get a copy of the MEME software please access <http://meme-suite.org>.

If you use MEME in your research, please cite the following paper:

Timothy L. Bailey and Charles Elkan, "Fitting a mixture model by expectation maximization to discover motifs in biopolymers", *Proceedings of the Second International Conference on Intelligent Systems for Molecular Biology*, pp. 28-36, AAAI Press, Menlo Park, California, 1994. [[pdf](#)]

[DISCOVERED MOTIFS](#) | [MOTIF LOCATIONS](#) | [INPUTS & SETTINGS](#) | [PROGRAM INFORMATION](#) | [RESULTS](#)  
[IN TEXT FORMAT](#)  | [RESULTS IN XML FORMAT](#) 

## DISCOVERED MOTIFS

|                                                        | Logo                                                                                | E-value    | Sites | Width | More              | Submit/D            |
|--------------------------------------------------------|-------------------------------------------------------------------------------------|------------|-------|-------|-------------------|---------------------|
| 1.                                                     |    | 1.1e-13805 | 1681  | 21    | <a href="#">↓</a> | <a href="#">...</a> |
| 2.                                                     |   | 1.4e-173   | 28    | 9     | <a href="#">↓</a> | <a href="#">...</a> |
| 3.                                                     |  | 1.9e-198   | 79    | 9     | <a href="#">↓</a> | <a href="#">...</a> |
| 4.                                                     |  | 3.1e-109   | 20    | 16    | <a href="#">↓</a> | <a href="#">...</a> |
| 5.                                                     |  | 9.2e-047   | 17    | 9     | <a href="#">↓</a> | <a href="#">...</a> |
| 6.                                                     |  | 5.6e-031   | 15    | 9     | <a href="#">↓</a> | <a href="#">...</a> |
| 7.                                                     |  | 4.2e-019   | 10    | 9     | <a href="#">↓</a> | <a href="#">...</a> |
| 8.                                                     |  | 6.8e-008   | 5     | 15    | <a href="#">↓</a> | <a href="#">...</a> |
| 9.                                                     |  | 2.8e-003   | 2     | 4     | <a href="#">↓</a> | <a href="#">...</a> |
| 10.                                                    |  | 2.1e-001   | 2     | 4     | <a href="#">↓</a> | <a href="#">...</a> |
| Stopped because requested number of motifs (10) found. |                                                                                     |            |       |       |                   |                     |

## MOTIF LOCATIONS

Output of sites suppressed because there were more than 1000 (primary) sequences.

## INPUTS & SETTINGS

### Sequences

| Role              | Source           | Alphabet | Sequence Count | Total Size |
|-------------------|------------------|----------|----------------|------------|
| Primary Sequences | SiteResult.fasta | Protein  | 1803           | 37863      |

### Background Model

**Source:** built from the (primary) sequences

**Order:** 0

|   | Name          | Freq.   | Bg.     |
|---|---------------|---------|---------|
| A | Alanine       | 0.0644  | 0.0644  |
| C | Cysteine      | 0.00378 | 0.00378 |
| D | Aspartic acid | 0.00383 | 0.00383 |
| E | Glutamic acid | 0.0446  | 0.0446  |
| F | Phenylalanine | 0.045   | 0.045   |
| G | Glycine       | 0.104   | 0.104   |
| H | Histidine     | 0.0929  | 0.0929  |
| I | Isoleucine    | 0.0493  | 0.0493  |
| K | Lysine        | 0.00233 | 0.00233 |
| L | Leucine       | 0.201   | 0.201   |
| M | Methionine    | 0.03    | 0.03    |
| N | Asparagine    | 0.0886  | 0.0886  |
| P | Proline       | 0.0481  | 0.0481  |
| Q | Glutamine     | 0.00256 | 0.00256 |
| R | Arginine      | 0.00145 | 0.00145 |
| S | Serine        | 0.0794  | 0.0794  |
| T | Threonine     | 0.0724  | 0.0724  |
| V | Valine        | 0.0575  | 0.0575  |
| W | Tryptophan    | 0.00349 | 0.00349 |
| Y | Tyrosine      | 0.00507 | 0.00507 |

### Other Settings

|                                 |                                      |
|---------------------------------|--------------------------------------|
| <b>Motif Site Distribution</b>  | ZOOPS: Zero or one site per sequence |
| <b>Objective Function</b>       | E-value of product of p-values       |
| <b>Starting Point Function</b>  | E-value of product of p-values       |
| <b>Site Strand Handling</b>     | This alphabet only has one strand    |
| <b>Maximum Number of Motifs</b> | 10                                   |
| <b>Motif E-value Threshold</b>  | no limit                             |
| <b>Minimum Motif Width</b>      | 3                                    |
| <b>Maximum Motif Width</b>      | 21                                   |
| <b>Minimum Sites per Motif</b>  | 2                                    |
| <b>Maximum Sites per Motif</b>  | 1803                                 |

[Show Advanced Settings](#)

**MEME version**

5.1.0 (Release date: Fri Oct 11 15:53:28 2019 -0700)

**Reference**

Timothy L. Bailey and Charles Elkan, "Fitting a mixture model by expectation maximization to discover motifs in biopolymers", *Proceedings of the Second International Conference on Intelligent Systems for Molecular Biology*, pp. 28-36, AAAI Press, Menlo Park, California, 1994.

**Command line**

```
meme SiteResult.fasta -protein -oc . -nostatus -time 18000 -mod zoops -nmotifs 10  
-minw 3 -maxw 50 -objfun classic -markov_order 0
```
